# Supplementary material for: The biogenesis pathway of tRNA-derived piRNAs in Bombyx germ cells
Source: PubMed Central journal article supplement — Nucleic Acids Res. 2017 Jun 22;45(15):9108–20. doi: 10.1093/nar/gkx537 (PMC5587776; doi:10.1093/nar/gkx537), 2017-06-22
Supplement: gkx537_Supp.pdf [file gkx537_Supp.pdf]

## SUPPLEMENTARY INFORMATION

### Supplementary Figure Legends

**Figure S1. A schematic representation of specific quantifications of 5'-tRNA half and td-piRNA by TaqMan qRT-PCR**

**Figure S2. Variant sequences of *Bombyx* cyto tRNA<sup>AspGUC</sup> (A), tRNA<sup>HisGUG</sup> (B), tRNA<sup>GluUUC</sup> (C), and tRNA<sup>GluCUC</sup> (D).**

Indicated variant sequences of *Bombyx* cyto tRNAs were identified using tRNAscan program (50) and aligned using the CLUSTALW algorithm. The sequences were sorted by the number of genome loci and mismatches; pink characters show minor sequences among variants.

### **Figure S3. BmThg11 amino acid sequences**

Sequences of BmThg11 and its homologs were aligned using Clustal X (version 2.1). BmThg11 was aligned with its counterparts from *D. melanogaster* (NP\_609737.1), *H. sapiens* (NP\_060342.2), *M. musculus* (NP\_001074438.1), *X. tropicalis* (XP\_002935942.2), and *D. rerio* (NP\_001007456.1). The Thg1 and Thg1C domains of BmThg11, as defined by the Pfam database (<http://pfam.sanger.ac.uk/>), are indicated.

### **Figure S4. BmNSun2 amino acid sequences**

BmNSun2 was aligned with its counterparts from *D. melanogaster* (NP\_652007.1), *H. sapiens* (NP\_060225.4), *M. musculus* (NP\_663329.3), *X. tropicalis* (NP\_001015962.1), and *D. rerio* (NP\_956005.1). The Nol1\_Nop2\_Fmu domain of BmNSun2 as defined by the Pfam database is indicated.

**Figure S5. Analyses of td-piR<sup>GluUUC/CUC</sup>**

(A) The 5'-terminal position of Siwi-bound td-piR<sup>GluUUC/CUC</sup> in the mature tRNA.

(B) The regions from which td-piR<sup>GluUUC/CUC</sup>, starting from np 1, were derived are shown in black in the cloverleaf secondary structure of *Bombyx cyto* tRNA<sup>GluUUC</sup>-V1 (**Supplementary Fig. S2**). Non-piRNA-derived regions are shown in gray.

(C) Total RNA from Rluc- or BmNsun2-depleted cells was subjected to Northern blot targeting the 5'-part of mature cyto tRNA<sup>GluUUC</sup>. 5'-half and td-piRNA, as well as mature tRNA, were all detected. The Northern blot bands were quantified and shown as relative abundance in the right graph. Abundances in Rluc-depleted cells were set as 1, and the averages of three independent experiments with bars showing the SD are shown.

**Figure S6. Northern blot detection of mature tRNAs and 5'-tRNA halves**

BmN4 total RNA was subjected to Northern blots targeting 5'-part of the indicated cyto tRNAs.

Detected 5'-halves<sup>Lys<sup>CUU</sup></sup> are indicated by a black line.

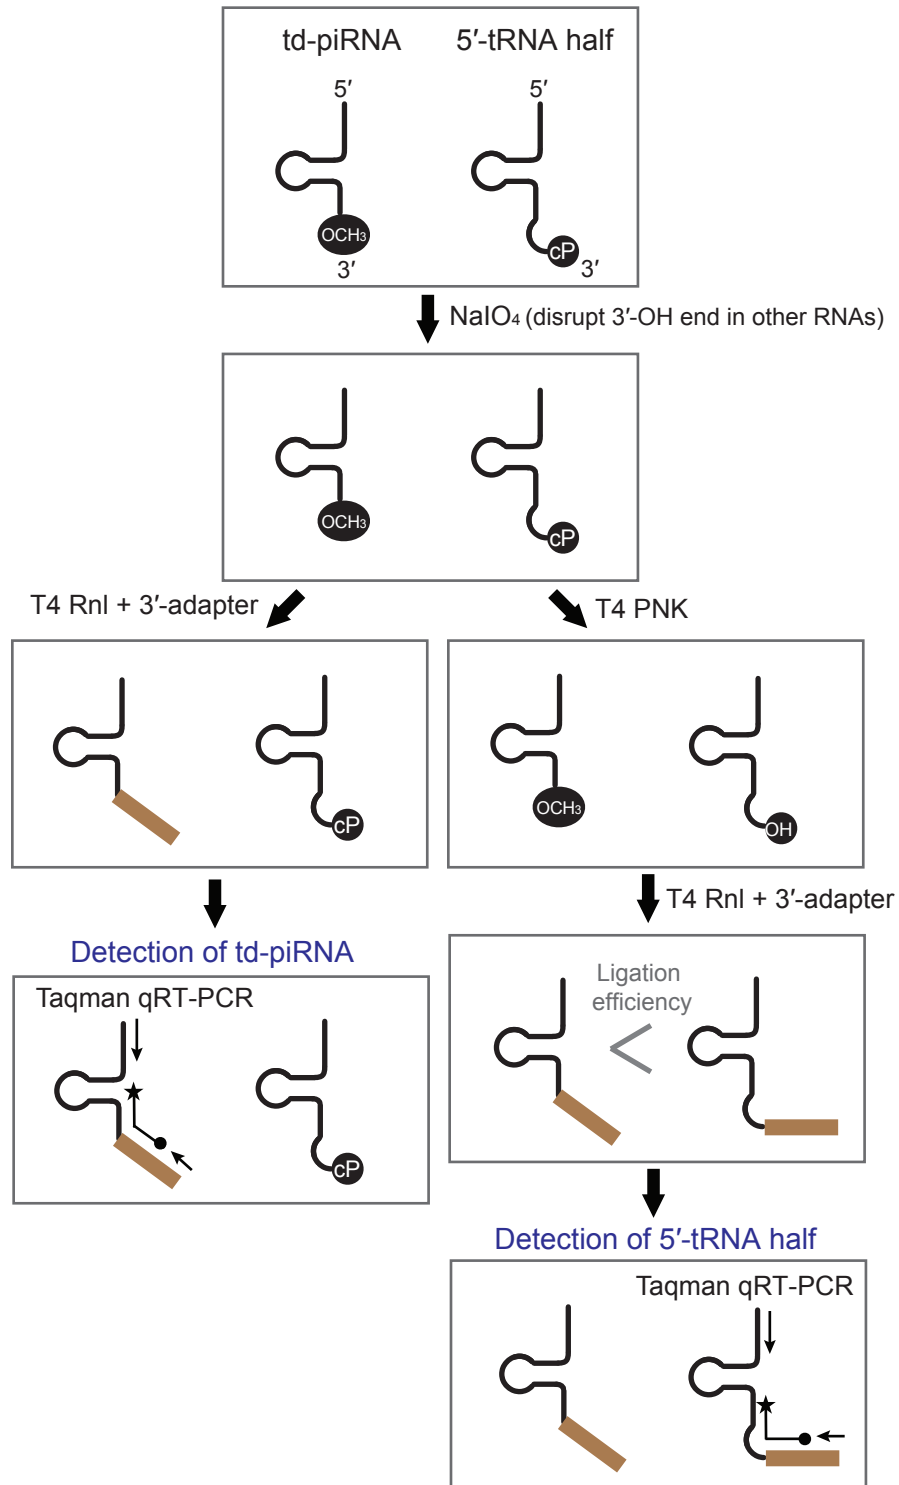

*Honda et al. Figure S1*

# A

|                             |                                                                                                                        | Genome loci |
|-----------------------------|------------------------------------------------------------------------------------------------------------------------|-------------|
| tRNA <sup>Asp</sup> GUC_V1  | TC <b>TTCGGTAGTATAGTGG</b> --TCAGTAT <b>CCCGCCTGTCACGCGGAGACCGGGGTTTCGAT</b> TCCCCGCCGG <b>AGAG</b>                    | 12          |
| tRNA <sup>Asp</sup> GUC_V2  | TCCTCGGTAGTATAGTGG-- <b>TGAGTATGCACGCCTGTCACGCGTGAGACCGGGGTTTCGAT</b> TCCCCGCCGGGGAG                                   | 4           |
| tRNA <sup>Asp</sup> GUC_V3  | TCCTCGGTAGTATAGTGG-- <b>TGAGTATGCTCGCCTGTCACGCGAGAGACCGGGGTTTCGAT</b> TCCCCGCCGGGGAG                                   | 3           |
| tRNA <sup>Asp</sup> GUC_V4  | TCCTCGGTAGTATAGTGG-- <b>TTAGTATGGCCGCCTGTCACGCGAAGACCGGGGTTTCGAT</b> TCCCCGCCGGGGAG                                    | 3           |
| tRNA <sup>Asp</sup> GUC_V5  | TCCTCGGTAGTACAGTGGG-TCAGTAT <b>ACTCGCCTGTCACGCGAGAGACCGGGGTTTCGAT</b> CCCCGCCGGGGAG                                    | 1           |
| tRNA <sup>Asp</sup> GUC_V6  | TCCTCGGTAGTATAGTGG-- <b>TGAGTATACTCGCCTGTCACGCGAGAGACCGGGGTTTCGAT</b> TCCCCGCCGGGGAG                                   | 1           |
| tRNA <sup>Asp</sup> GUC_V7  | TCCTCGGTAGTACAGTGGG-TCAGTATGCTCGCCTGTCACGCGAGAGACCGGGGTT <b>CGAGC</b> CCCCGCC <b>AGGAG</b>                             | 1           |
| tRNA <sup>Asp</sup> GUC_V8  | TCCTCGGTAGTACAGTGGG-TCAGTATGCTCGCCTGTCACG <b>TGAGAGACCGGGGTTTCGAT</b> CCCCGCC <b>AGGAG</b>                             | 1           |
| tRNA <sup>Asp</sup> GUC_V9  | TCCTCGGTAGTACAGTGGG-TCAGTAT <b>ACTCGCCTGTCACGCGAGAGAACGGGGTTCGAT</b> CCCCG <b>CGGGGAG</b>                              | 1           |
| tRNA <sup>Asp</sup> GUC_V10 | TCCTCGGTAGTACAGTGGG-TCAGTATGCTCGCCTGTCACG <b>TGAGAGACCGGGGTTTCGAGC</b> CCCCGCC <b>AGAAG</b>                            | 1           |
| tRNA <sup>Asp</sup> GUC_V11 | TCCTCGGTAGTATAGTGG--TCAGTAT <b>CCCGCCTGTCACGCGGAGACCGGGGTTTCGAT</b> TCCCCGCCGGGGAG                                     | 1           |
| tRNA <sup>Asp</sup> GUC_V12 | <b>TCATCAGCAGTACAGTAGG</b> -TCAGTATGCTCGCCTGTCAC <b>ACGAGAGACCGGGGTTTCGAT</b> CCCCGCCGGGGAG                            | 1           |
| tRNA <sup>Asp</sup> GUC_V13 | <b>TCATCGGTAGTACAGTGGGGT</b> CAGTATGCTCGC <b>TTGTACACGAGAGACCGGGGTTTCGAA</b> CCCCGCCGGGGAG.                            | 1           |
| tRNA <sup>Asp</sup> GUC_V14 | TC <b>TTCGGTAGTATAGTGG</b> --TCAGTAT <b>CCCGCCTGTCACGCGGAGACCGGATTTTAAT</b> TCCCCGCC <b>AGAGAG</b>                     | 1           |
| tRNA <sup>Asp</sup> GUC_V15 | TCCT <b>TGT</b> TTAGTATAGTGG-- <b>TGAATATATT</b> CGCCTGTCAC <b>CAAGAGACTGGGC</b> TT <b>AAAT</b> TCCCCGCC <b>AAGGAG</b> | 1           |
| tRNA <sup>Asp</sup> GUC_V16 | ..... <b>GGCGTGTGG</b> -- <b>TAAGTGATACCGACTGTCGTTTCGAGGTCGCGGGTTCGAT</b> CCCC <b>GCACAGGACA</b>                       | 1           |

# B

|                         |                                                                                          | Genome loci |
|-------------------------|------------------------------------------------------------------------------------------|-------------|
| tRNA <sup>His</sup> GUG | <b>GCCGTGATCGTCTAGTGGTTAGGACCCTACGTTGTGGCCGTAGTA</b> AACCAGGTT <b>CGAATCCTGGTCACGGCA</b> | 14          |

# C

|                            |                                                                                                                         | Genome loci |
|----------------------------|-------------------------------------------------------------------------------------------------------------------------|-------------|
| tRNA <sup>Glu</sup> UUC_V1 | <b>TCCCGTATGGTCTAGTGGCTAGGATACCTGGCTTTCACCCAGGAGGCTC</b> GGGTT <b>CGATTCCC</b> GGTACGGG <b>AA</b>                       | 12          |
| tRNA <sup>Glu</sup> UUC_V2 | <b>TCCCGTATGGTCTAGTGGCTAGGATACCTGGCTTTCACCCAGGAGGCTC</b> AGGTT <b>CGATTCCC</b> GGTACGGG <b>AA</b>                       | 1           |
| tRNA <sup>Glu</sup> UUC_V3 | <b>TCCCGTATGGTCTAGTGGCTAGGATACCTGGCTTTCACCCAGGAGGCTC</b> GGG <b>ATCGATTCCC</b> GGTACGGG <b>AA</b>                       | 1           |
| tRNA <sup>Glu</sup> UUC_V4 | <b>TT<b>CGAT</b>ATGGTCTAGTGGCTAC</b> GATACCTGGCTTTCACCCAGGAGGCT <b>CATTTTCGATTCCC</b> GGT <b>TCGGAA</b>                 | 1           |
| tRNA <sup>Glu</sup> GUC_V5 | <b>TCC<b>GAT</b>ATGGTCTAGT<b>AA</b>C</b> -AGGATACCTGGCTTTC <b>ATCCAGGAGGCTC</b> TGGTT <b>CGCTTCCC</b> G <b>ATTCGGAA</b> | 1           |

# D

|                            |                                                                                                                                         | Genome loci |
|----------------------------|-----------------------------------------------------------------------------------------------------------------------------------------|-------------|
| tRNA <sup>Glu</sup> CUC_V1 | <b>TCCG<b>A</b>TATGGTCTAGTGGCTAGGATACCTGGCTCTC</b> ACCCAGGAGGCTCGGGTT <b>CGATTCCC</b> GGT <b>ATTCGGAA</b>                               | 6           |
| tRNA <sup>Glu</sup> CUC_V2 | <b>TCCGGTATGGTCTAGTGGCTAGGATACCTGGCTCTC</b> ACCCAGGAGGCTCGGGTT <b>CGATTCCC</b> GGT <b>ACCGGAA</b>                                       | 1           |
| tRNA <sup>Glu</sup> CUC_V3 | <b>TC<b>GGG</b>TATGGTCTAGTGGCTAGGATACCTGGCTCTC</b> ACCCAGGAGGCTCGGGTT <b>CGATTCCC</b> GGT <b>ACCGGAA</b>                                | 1           |
| tRNA <sup>Glu</sup> CUC_V4 | <b>TCCG<b>A</b>TATGGTCTAGTGGCTAG<b>A</b>ATACCTGGCTCTC</b> ACCCAGGAGGCTCGGGTT <b>CGATTCCC</b> GGT <b>ATTCGGAA</b>                        | 1           |
| tRNA <sup>Glu</sup> CUC_V5 | <b>TCCG<b>A</b>TATGGTCTAGTGGCTAGGATACCTGGCTCTC</b> ACCCAGGAGGCTCGGGTT <b>CGATTCC<b>AGG</b>TA</b> TCGG <b>AA</b>                         | 1           |
| tRNA <sup>Glu</sup> CUC_V6 | <b>TT<b>CGGT</b><b>G</b>TGGTCTAGT<b>G</b>C</b> TAGGATACCT <b>AGCTCTC</b> ACCCAGGAGGCTCGGGTT <b>CGATTCCC</b> GG <b>C</b> ACCG <b>GAA</b> | 1           |
| tRNA <sup>Glu</sup> CUC_V7 | <b>TCC<b>C</b>GATATGGTCTAGTGGCTAGGATAC<b>AC</b>GGCTCTC</b> ACCC <b>G</b> TGAGGCTCGGGTT <b>CGATTCCC</b> GGT <b>ACGGGAA</b>               | 1           |

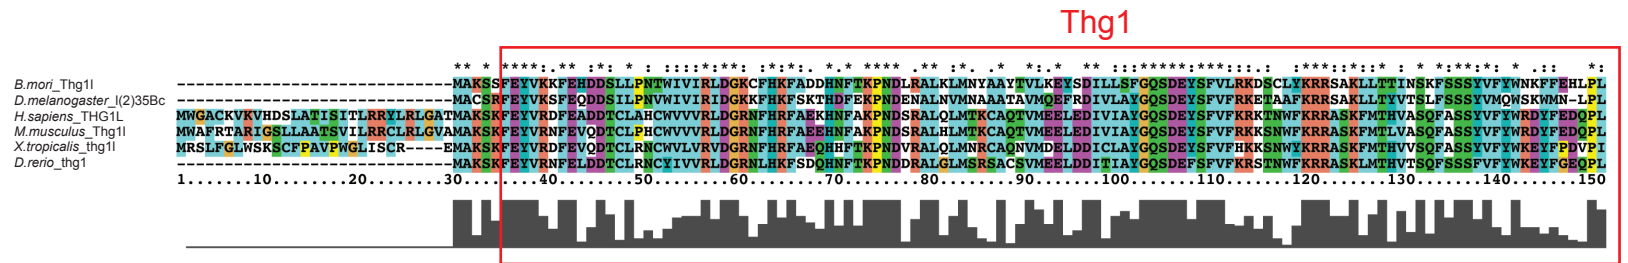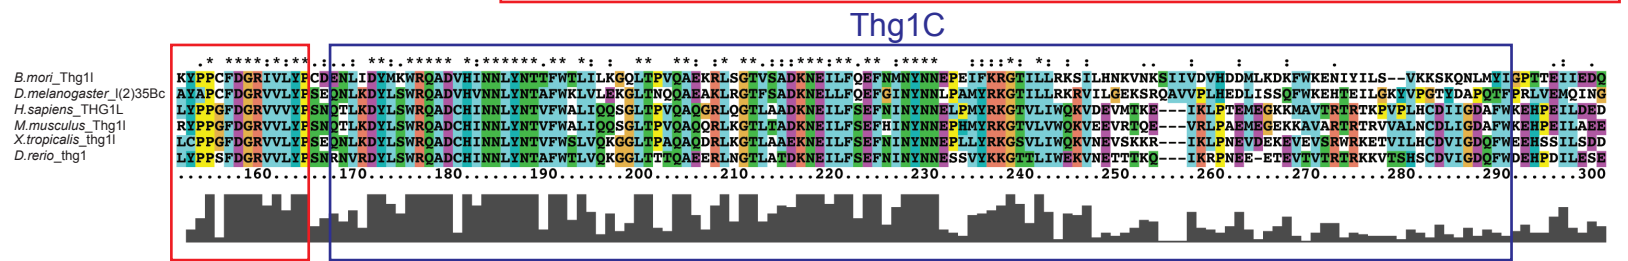

|                               |                                            |     |
|-------------------------------|--------------------------------------------|-----|
| <i>B.mori_Thg1</i>            | LSKY <b>ES</b> -----HLEA--                 | 316 |
| <i>D.melanogaster_(2)35Bc</i> | KDD <b>NEA</b> EE <b>P</b> ONLAG <b>TS</b> | 316 |
| <i>H.sapiens_Thg1L</i>        | S-----                                     | 316 |
| <i>M.musculus_Thg1</i>        | N-----                                     | 316 |
| <i>X.tropicalis_thg1</i>      | S-----                                     | 316 |
| <i>D.reio_thg1</i>            | QC-----                                    | 316 |
|                               | .....310.....                              |     |

Honda et al. Figure S3

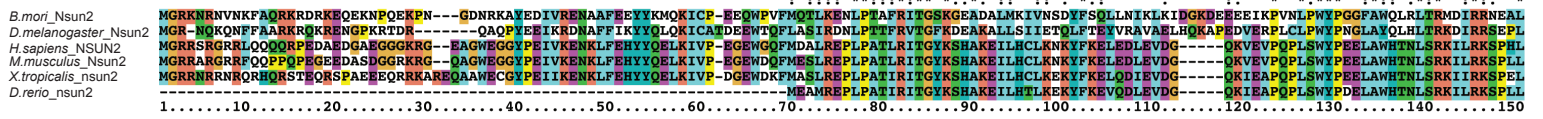

Nol1\_Nop2\_Fmu

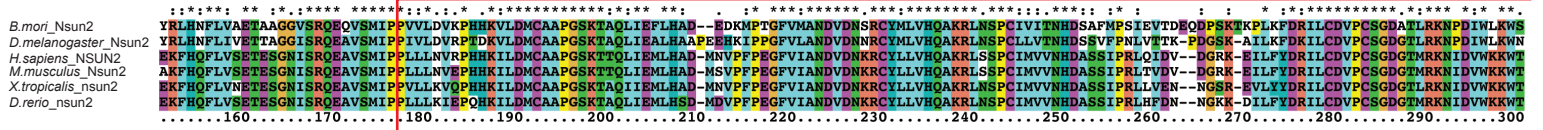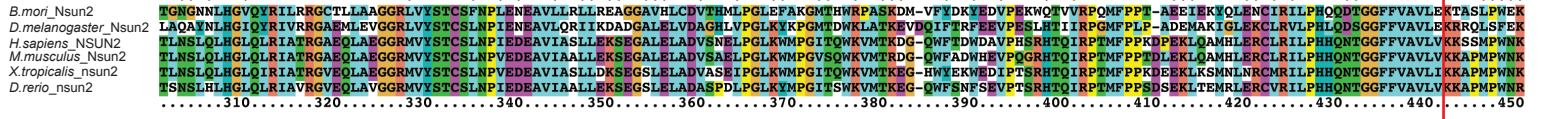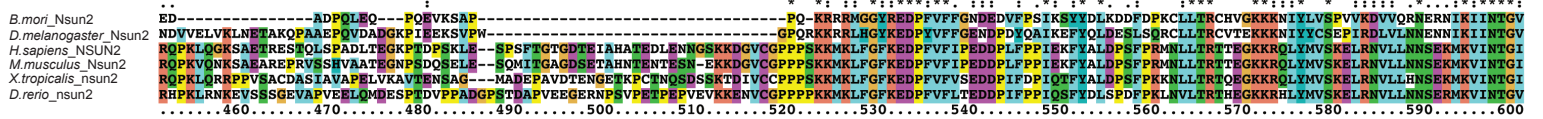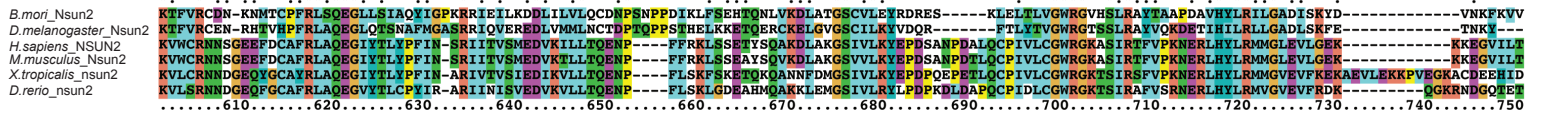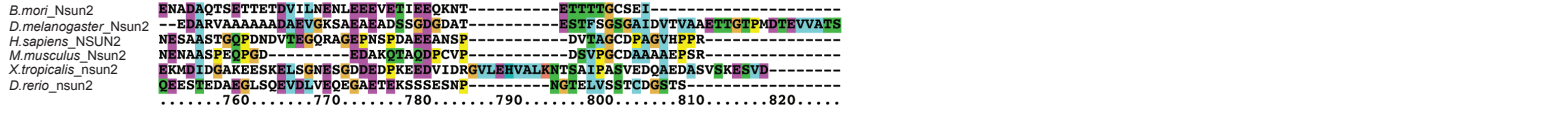

Honda et al. Figure S4

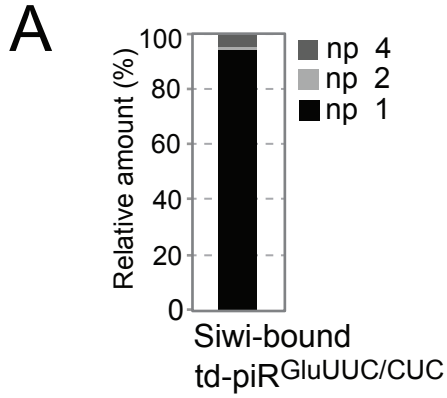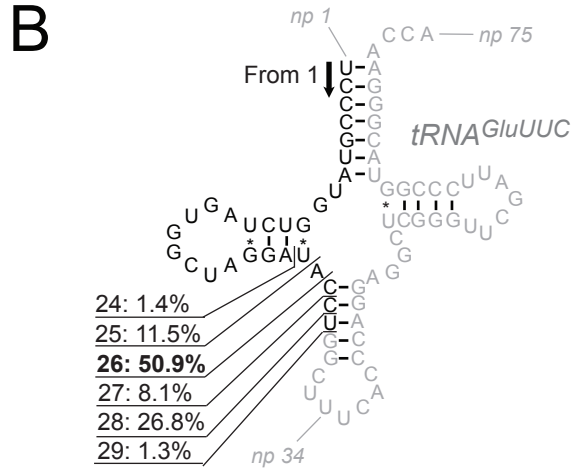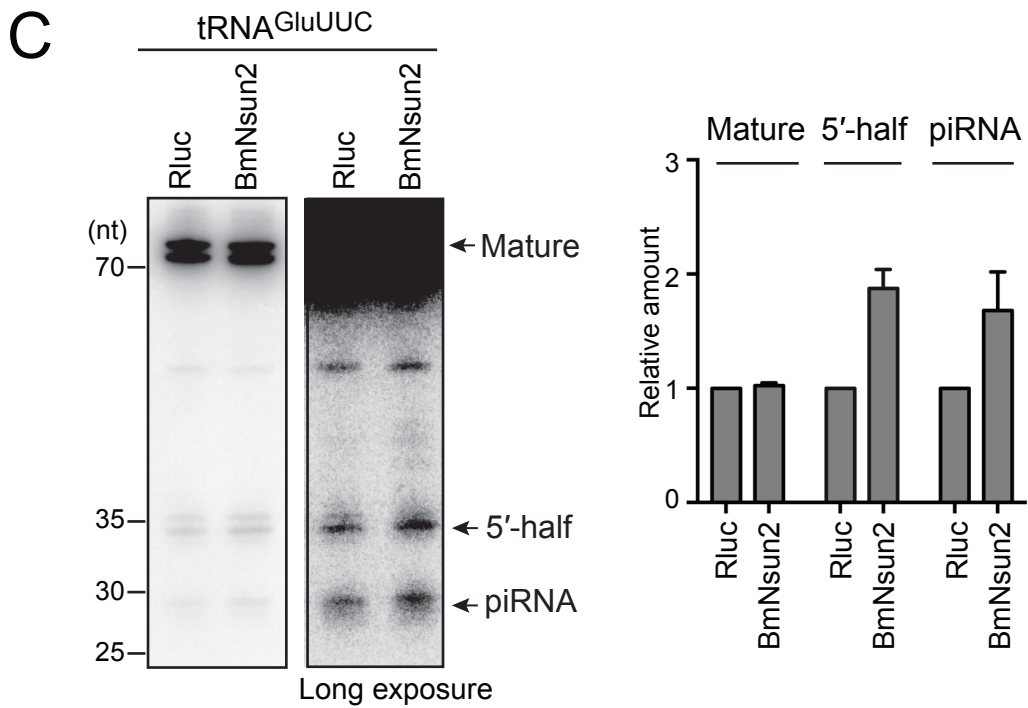

*Honda et al. Figure S5*

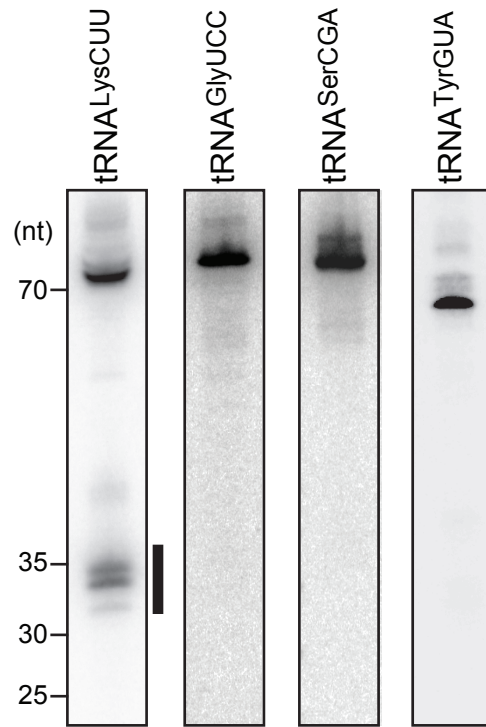

*Honda et al. Figure S6*



**Table S1. Sequences of primers and TaqMan probes for quantification of 5'-tRNA halves and td-piRNAs by TaqMan qRT-PCR**

| Target                    | Primer/ probe  | Sequence (5'-3')                                     |
|---------------------------|----------------|------------------------------------------------------|
| 5'-half <sup>AspGUC</sup> | Forward primer | CGGGTCTTCGGTAGTATAGT                                 |
|                           | Reverse primer | GATCGTCGGACTGTAGAACTC                                |
|                           | TaqMan probe   | /56FAM/TATCCCCGC/ZEN/CTGGAACACTGCGTTT/3IABkFQ/       |
| 5'-half <sup>HisGUG</sup> | Forward primer | GCTCGCCGTGATCGTCTAGT                                 |
|                           | Reverse primer | GATCGTCGGACTGTAGAACTC                                |
|                           | TaqMan probe   | /56-FAM/TAGGACCCT/ZEN/ACGTTGGAACACTGCGTTTGC/3IABkFQ/ |
| td-piR <sup>AspGUC</sup>  | Forward primer | CGGGTCTTCGGTAGTATA                                   |
|                           | Reverse primer | GATCGTCGGACTGTAGAACTC                                |
|                           | TaqMan probe   | /56-FAM/CAGTATCCC/ZEN/GAACACTGCGTTTGC/3IABkFQ/       |
| td-piR <sup>HisGUG</sup>  | Forward primer | ACATGCCGTGATCGTC                                     |
|                           | Reverse primer | GATCGTCGGACTGTAGAACTC                                |
|                           | TaqMan probe   | /56-FAM/TTAGGACCG/ZEN/AACACTGCGTTTGC/3IABkFQ/        |

**Table S2. Sequences of probes for Northern blot**

| Target                     | Sequence (5'–3')                               |
|----------------------------|------------------------------------------------|
| 5'-half <sup>Asp</sup> GUC | GGGATACTGACCACTATACTACCGAAGA                   |
| 3'-half <sup>Asp</sup> GUG | GGCGGGGAATCGAACCCCGGTCTCC                      |
| 5'-half <sup>His</sup> GUG | GGGTCCTAACCACTAGACGATCACGGC                    |
| 3'-half <sup>His</sup> GUG | GG <u>ATT</u> CGA <u>ACCT</u> GGGTT <u>ACT</u> |
| 5'-half <sup>Glu</sup> UUC | GGTATCCTAGCCACTAGACCATAACG                     |
| 5'-half <sup>Lys</sup> CUU | GTCATGCTCTACCGACTGAGCTAG                       |
| tRNA <sup>Gly</sup> UCC    | GTATGCTGACCATTACACCACCAACGC                    |
| tRNA <sup>Ser</sup> CGA    | GACGCCTTAACCACTCGGCCACGACTG                    |
| tRNA <sup>Tyr</sup> GUA    | GCTCTACCAACTGAGCT                              |
| piR-1                      | GTTCGAAACCAATCCGTTAGTTTTTGA                    |
| piR-2                      | GCCGCAGACAGCAAATTCTCATGCTTTT                   |
| let-7                      | GTACTATACAACCTACTACCTCA                        |
| 5S rRNA                    | GCTTGACTTCGGTGATCGGACGAGAAC                    |

Locked Nucleic Acid (LNA)-modified probes were used for the detection of 3'-half<sup>His</sup>GUG (underlined letters designate LNA).

**Table S3. Sequences of primers for the production of DNA templates for *in vitro* dsRNA synthesis**

| Target         | Primer  | Sequence (5'–3')                                 |
|----------------|---------|--------------------------------------------------|
| Rluc (control) | Forward | TAATACGACTCACTATAGGGGTCGGCCATGATTGGGGTGCTTGTTG   |
|                | Reverse | TAATACGACTCACTATAGGGCCCATTTTCATCAGGTGCATCTTCTTGC |
| BmThg11        | Forward | TAATACGACTCACTATAGGGTCGTCATCGTATGTTTTCTACTGG     |
|                | Reverse | TAATACGACTCACTATAGGGTTCCTCCTTGAATATTTCTGG        |
| BmNSun2        | Forward | TAATACGACTCACTATAGGGAGGCATTGTATCGGCTTCATAA       |
|                | Reverse | TAATACGACTCACTATAGGGACGGTACGTCGCACAATATCC        |

**Table S4. Sequences of primers for mRNA quantification by qRT-PCR**

| Target  | Primer  | Sequence (5'–3')          |
|---------|---------|---------------------------|
| BmRp49  | Forward | GGATCGCTATGACAAACTTAAGAGG |
|         | Reverse | TATGACGGGTCTTCTTGTTGGA    |
| BmThg11 | Forward | AAATGGCAAAGAGTTCCTTCG     |
|         | Reverse | TCGTTAGGCTTCGTAAAGTTGTG   |
| BmNsun2 | Forward | CTGACGCTCTAATGAAGATTGTGAA |
|         | Reverse | CTCCAGGGTACCAAGGCAAA      |

**Table S5. Sequences of primers for the qRT-PCR using a stem-loop primer**

| Target  | Primer     | Sequence (5'–3')                                    |
|---------|------------|-----------------------------------------------------|
| piR-1   | Forward    | CCGCTCAAAAATAACGGATTG                               |
|         | SL-Reverse | GTCGTATCCAGTGCAGGGTCCGAGGTATTCGCACTGGATACGACGTTCTGA |
| piR-2   | Forward    | CGCCAAAAGCATGAGAATTTGC                              |
|         | SL-Reverse | GTCGTATCCAGTGCAGGGTCCGAGGTATTCGCACTGGATACGACCCGCAG  |
| let-7   | Forward    | CGGGTGAGGTAGTAGGTTG                                 |
|         | SL-Reverse | GTCGTATCCAGTGCAGGGTCCGAGGTATTCGCACTGGATACGACTACTAT  |
| 5S rRNA | Forward    | TAATGGTGACCGCCTGGGAACACC                            |
|         | SL-Reverse | GTCGTATCCAGTGCAGGGTCCGAGGTATTCGCACTGGATACGACAAGCCA  |
